# Supplementary material for: Trends in the exploitation of novel drug targets
Source: Springer Nature journal article supplement (doi:10.1038/nrd3478), 2011-08-01
Supplement: 41573_2011_BFnrd3478_MOESM4_ESM.pdf [file 41573_2011_BFnrd3478_MOESM4_ESM.pdf]

**Supplementary information S2 | List of all gene abbreviations included in Table 1**

ABAT, 4-aminobutyrate aminotransferase; ADA, adenosine deaminase; ADH1B, alcohol dehydrogenase 1B; ADRA1D,  $\alpha$ 1D adrenergic receptor; AGTR1, angiotensin II receptor type 1; ALPPL2, alkaline phosphatase, placental-like 2; AMY2A, pancreatic  $\alpha$ -amylase; ATP4A, potassium-transporting ATPase  $\alpha$ -chain 1; BCR-ABL fusion, BCR-ABL fusion protein isoform X9; C5, complement C5; CA2, carbonic anhydrase 2; CACNA1A, voltage-dependent P/Q-type calcium channel subunit  $\alpha$ 1A; CACNA1B, voltage-dependent N-type calcium channel subunit  $\alpha$ 1B; CACNA1C, voltage-dependent L-type calcium channel subunit  $\alpha$ 1C; CASR, extracellular calcium-sensing receptor; CCR5, CC chemokine receptor type 5; CD2, T cell surface antigen CD2; CD33, myeloid cell surface antigen CD33; CD3E, T cell surface glycoprotein CD3  $\epsilon$ -chain; CD52, CAMPATH1 antigen; CD80, T lymphocyte activation antigen CD80; CEACAM1, carcinoembryonic antigen-related cell adhesion molecule 1; CHD1, chromodomain helicase DNA-binding protein 1; CLCN2, chloride channel protein 2; CNR1, cannabinoid receptor 1; COMT, catechol-O-methyltransferase; CPS1, carbamoyl-phosphate synthase 1; CSF2RA, granulocyte-macrophage colony-stimulating factor receptor subunit- $\alpha$ ; CSF3R, granulocyte colony-stimulating factor 3 receptor; CXCR4, CXC chemokine receptor type 4; CYSLTR1, cysteinyl leukotriene receptor 1; DHODH, dihydroorotate dehydrogenase; DPEP1, dipeptidase 1; DPP4, dipeptidyl peptidase 4; EDNRB, endothelin B receptor; EGFR, epidermal growth factor receptor; ELA2, elastase 2; EPOR, erythropoietin receptor; F8, coagulation factor VIII; FDPS, farnesyl diphosphate synthase; FGF1, fibroblast growth factor 1; FGFR2, fibroblast growth factor receptor 2; FKBP1A, peptidyl-prolyl cis-trans isomerase FKBP1A; FLT1, Vascular endothelial growth factor 1; FRAP1, FRAP1, serine/threonine-protein kinase mTOR; FSHR, follicle-stimulating hormone receptor; GART, trifunctional purine biosynthetic protein adenosine-3; GHRHR, growth hormone-releasing hormone receptor; GLP1R, glucagon-like peptide 1 receptor; HDAC1, histone deacetylase 1; HMGCR, 3-hydroxy-3-methylglutaryl-coenzyme A reductase; HPD, 4-hydroxyphenylpyruvate dioxygenase; HSD3B1, 3 $\beta$ -hydroxysteroid dehydrogenase/ $\delta$ 5 $\rightarrow$ 4-isomerase type 1; HTR3A, 5-hydroxytryptamine receptor 3A; HTR4, 5-hydroxytryptamine receptor 4; IFNAR1, interferon- $\alpha$  / $\beta$  receptor 1; IFNGR1, interferon  $\gamma$  receptor 1; IgE, immunoglobulin E; IGF1R, insulin-like growth factor 1 receptor; IKBKB, inhibitor of nuclear factor  $\kappa$ -B kinase subunit- $\beta$ ; IL11RA, interleukin 11 receptor  $\alpha$ -subunit; IL12A, interleukin-12 subunit  $\alpha$ ; IL1A, interleukin-1 $\alpha$ ; IL1B, interleukin-1 $\beta$ ; IL1R1, interleukin-1 receptor type 1; IL2RA, interleukin 2 receptor  $\alpha$ -subunit; IL6R, interleukin-6 receptor subunit  $\alpha$ ; IMPDH2, inosine-5'-monophosphate dehydrogenase 2; ITGA4, integrin  $\alpha$ 4; ITGB3, integrin  $\beta$ 3; KCNE1, potassium voltage-gated channel subfamily E member 1; KCNH2, potassium voltage-gated channel subfamily H member 2; KLK1, kallikrein 1; M6PRBP1, perilipin 3; MAOB, monoamine oxidase type B; MME, neprilysin; MPL, thrombopoietin receptor; MS4A1, membrane-spanning 4-domains, subfamily A, member 1; MTNR1A, melatonin receptor 1A; NPC1L1, Niemann-Pick C1-like protein 1; P2RY12, P2Y purinergic receptor 12; PDE4B, cAMP-specific 3',5'-cyclic phosphodiesterase 4B; PDGFRB,  $\beta$ -type platelet-derived growth factor receptor; PLAT, tissue-type plasminogen activator; PLG, plasminogen; PNLIP, pancreatic triacylglycerol lipase; POLA1, DNA polymerase  $\alpha$ -catalytic subunit; PPARC, peroxisome proliferator-activated receptor- $\gamma$ ; PPP3R2, calcineurin subunit B type 2; PRKAB1, 5'-AMP-activated protein kinase subunit  $\beta$ 1; PSMA, glutamate carboxypeptidase 2; PSMB1, proteasome subunit  $\beta$  type 1; PTGFR, prostaglandin F $_{2\alpha}$  receptor; PTHR1, parathyroid hormone/parathyroid hormone-related peptide receptor; RAMP1, receptor activity-modifying protein 1; RANKL, tumour necrosis factor ligand superfamily member 11 (also known as TNFSF11); REN, renin; RYR1, ryanodine receptor 1; S1PR1, sphingosine 1-phosphate receptor 1; SERPIND1, heparin cofactor 2; SLC12A2, solute carrier family 12 member 2; SLC6A1, sodium- and chloride-dependent GABA transporter 1; SNAP25, synaptosome-associated protein (relative molecular mass 25K); SRD5A1, steroid-5- $\alpha$ -reductase 1,  $\alpha$ -polypeptide 1; SSTR1, somatostatin receptor type 1; TACR1, substance P receptor; TLR7, toll-like receptor 7; TNF, tumour necrosis factor; TOP1, DNA topoisomerase 1; TOP2A, DNA topoisomerase 2 $\alpha$ ; TSHR, thyroid stimulating hormone receptor; TUBB1, tubulin  $\beta$ 1 chain; UGCG, UDP-glucose ceramide glucosyltransferase; VAMP1, vesicle-associated membrane protein 1; VEGF, vascular endothelial growth factor A.
