# Supplementary material for: Trends in the exploitation of novel drug targets
Source: Springer Nature journal article supplement (doi:10.1038/nrd3478), 2011-08-01
Supplement: 41573_2011_BFnrd3478_MOESM5_ESM.pdf [file 41573_2011_BFnrd3478_MOESM5_ESM.pdf]

Supplementary information S3 | Drug-target network: summary

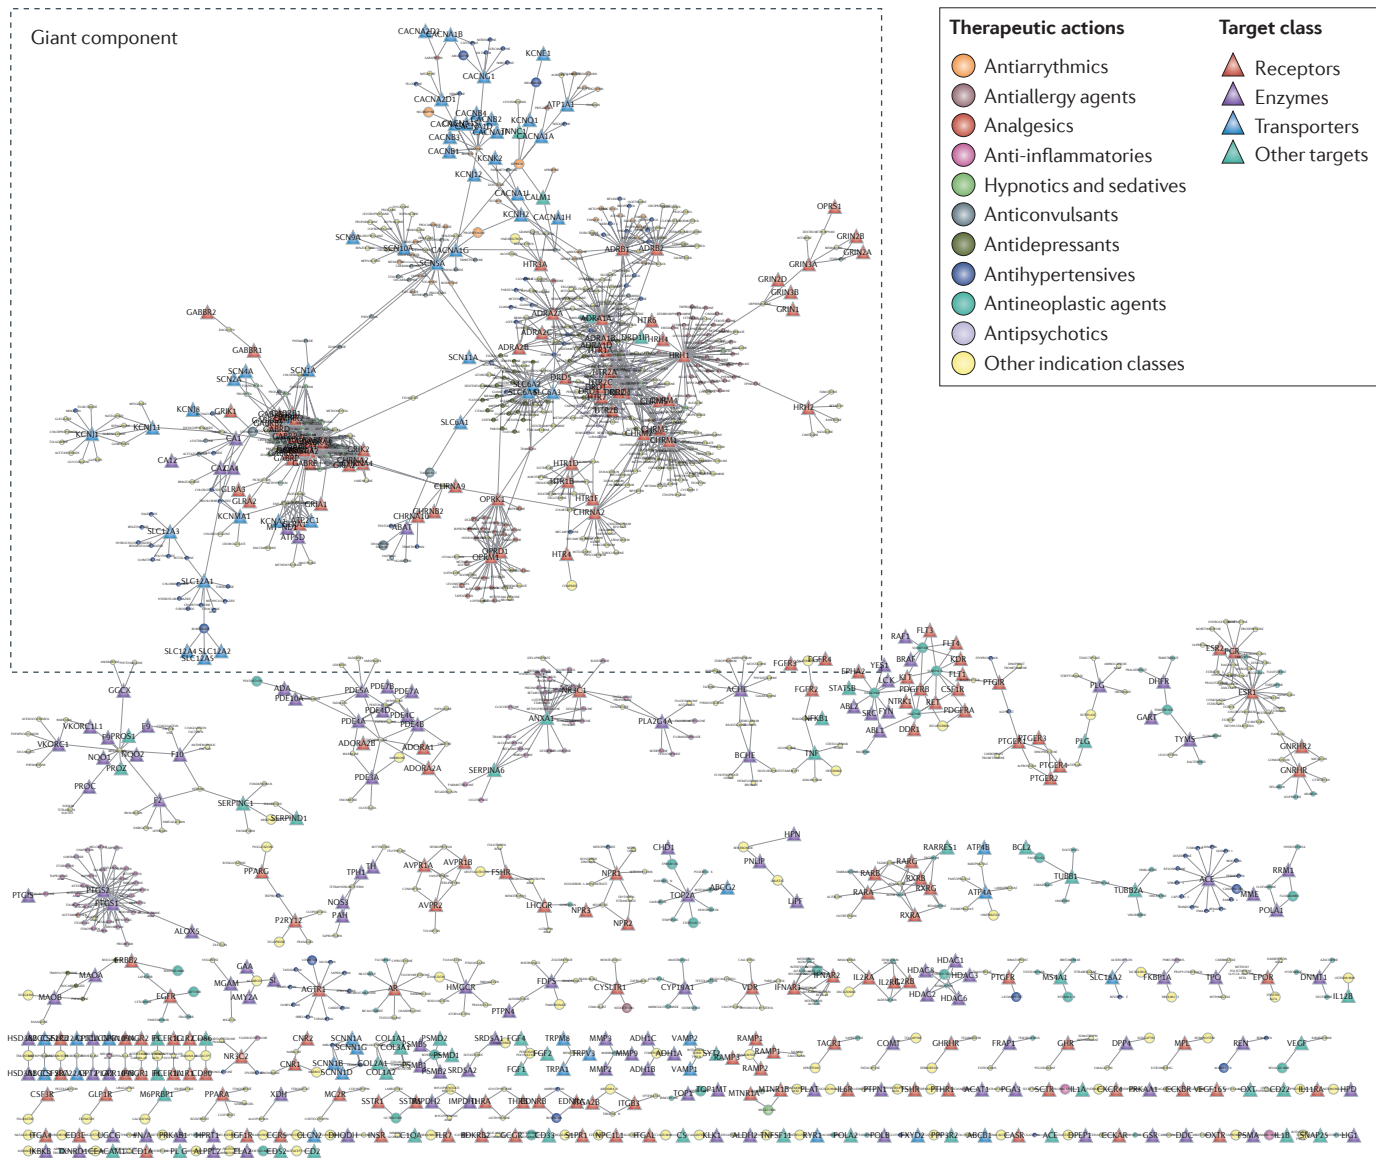

This figure provides a graphical representation of all of the interactions between drugs and therapeutic drug targets in our curated data set. Nodes represent targets (shown as triangles) and drugs (shown as circles). Novel target drugs (NTDs) are represented with large circles and drugs with established targets are represented with small circles. Interacting drugs and targets are connected with lines. This network was created using Cytoscape. Several isolated components have been identified in our data set, the largest of which we have called the giant component. The giant component includes 49% of all drugs and 30% of all drug targets in our data set.
